# Supplementary material for: Structural Characterization of BIAN Type Molecules Used in Viscosity Reduction of Alkyl Magnesium Solutions
Source: MDPI journal article supplement (doi:10.3390/molecules28020489), 2023-01-04
Supplement: s1 [file s1]

# Structural Characterization of BIAN type molecules used in viscosity reduction of alkyl magnesium solutions

Julia Felicitas Schwarz<sup>1</sup>, Lukas Gadermayr<sup>1</sup>, Samuel Redl<sup>2</sup>, Thorsten Holtrichter-Rößmann<sup>3</sup>, Christian Paulik<sup>1</sup> and Clemens Schwarzingher<sup>1,\*</sup>

<sup>1</sup> Institute for Chemical Technology of Organic Materials, Johannes Kepler University (JKU), Altenberger Strasse 69, 4040 Linz, Austria

<sup>2</sup> Institute of Inorganic Chemistry, Johannes Kepler University (JKU), Altenberger Strasse 69, 4040 Linz, Austria

<sup>3</sup> Lanxess Organometallics GmbH, Ernst-Schering-Straße 14, 59192 Bergkamen, Germany

\* Correspondence: clemens.schwarzingher@jku.at

## 1. NMR spectroscopy of BIAN derivatives

a. *N*<sup>1</sup>,*N*<sup>2</sup>-Diphenylacenaphthylene-1,2-diimine (BIAN): Yellow crystalline solid

Analytical data:

<sup>1</sup>H NMR (300 MHz, CDCl<sub>3</sub>, 20 °C): δ = 7.91 (d, *J* = 8.28 Hz, 2H), 7.50 (t, *J* = 7.50 Hz, 4H), 7.39 (t, *J* = 7.76 Hz, 2H), 7.29 (t, *J* = 7.37 Hz, 3H, overlapping), 7.16 (d, *J* = 7.83 Hz, 4H), 6.86 (d, *J* = 7.23 Hz, 2H) ppm;

<sup>13</sup>C NMR (75.5 MHz, CDCl<sub>3</sub>, 20 °C): δ = 161.3, 151.8, 141.8, 131.2, 129.4, 129.0, 128.5, 127.7, 124.4, 124.0, 118.2 ppm;

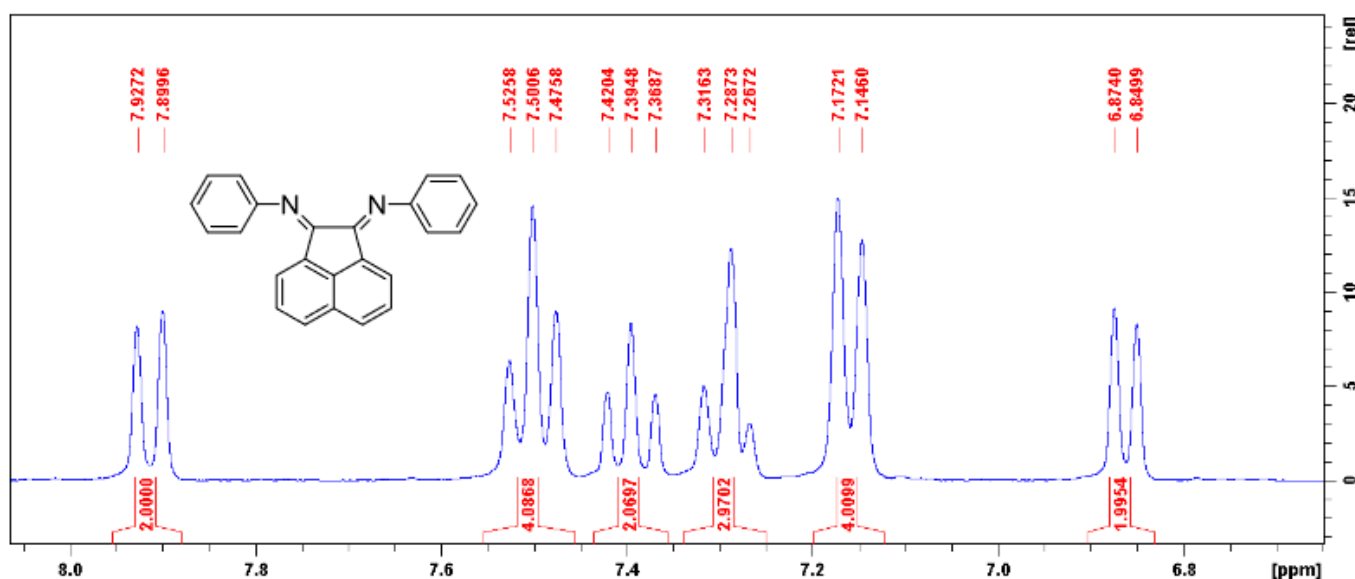

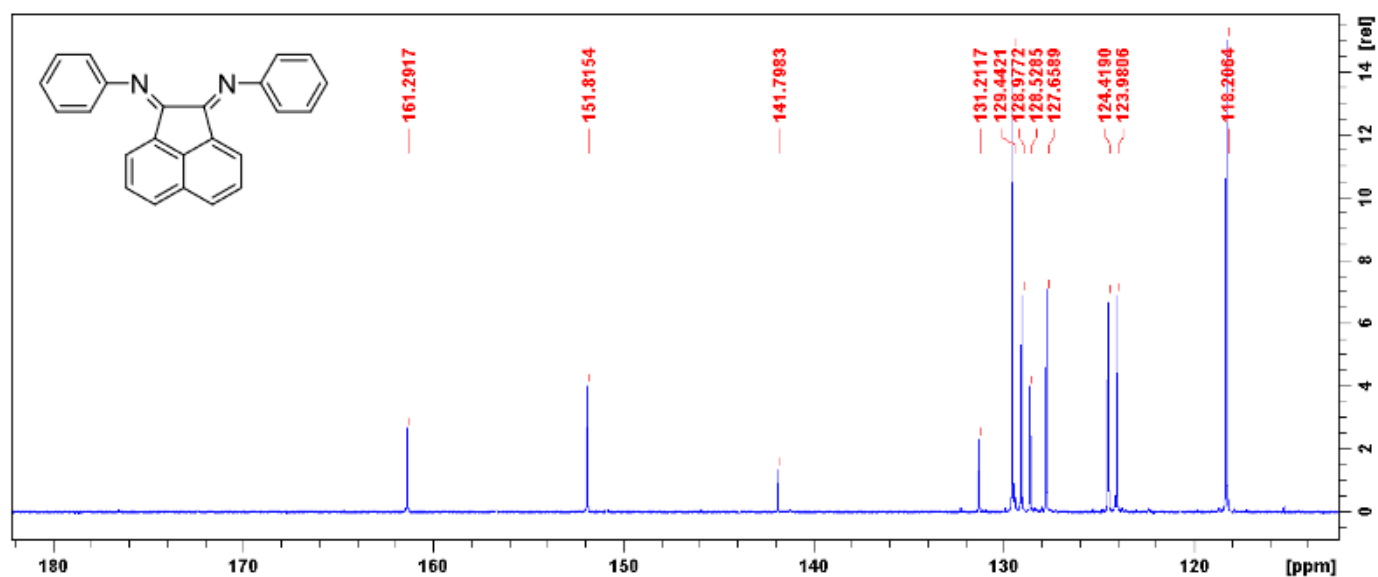Figure S2.  $^{13}\text{C}$ -NMR of BIAN in  $\text{CDCl}_3$ .

b.  $N^1,N^2$ -Bis(2,6-diisopropylphenyl)acenaphthylene-1,2-diimine (*i*-Pr-BIAN): Orange crystalline solid

Analytical data:

$^1\text{H}$  NMR (300 MHz,  $\text{CDCl}_3$ , 20 °C):  $\delta$  = 7.86 (d,  $J$  = 8.28 Hz, 2H), 7.36 (t,  $J$  = 7.77 Hz, 2H), 7.30 – 7.20 (m, 6H, overlapping), 6.65 (d,  $J$  = 7.14 Hz, 2H), 2.96 – 3.10 (m, 4H), 1.23 (d,  $J$  = 6.84 Hz, 12H), 0.98 (d,  $J$  = 6.78 Hz, 12H) ppm;

$^{13}\text{C}$  NMR (75.5 MHz,  $\text{CDCl}_3$ , 20 °C):  $\delta$  = 161.0, 147.5, 135.4, 131.1, 129.5, 128.9, 127.9, 124.3, 123.5, 123.4, 28.6, 23.6, 23.1 ppm.

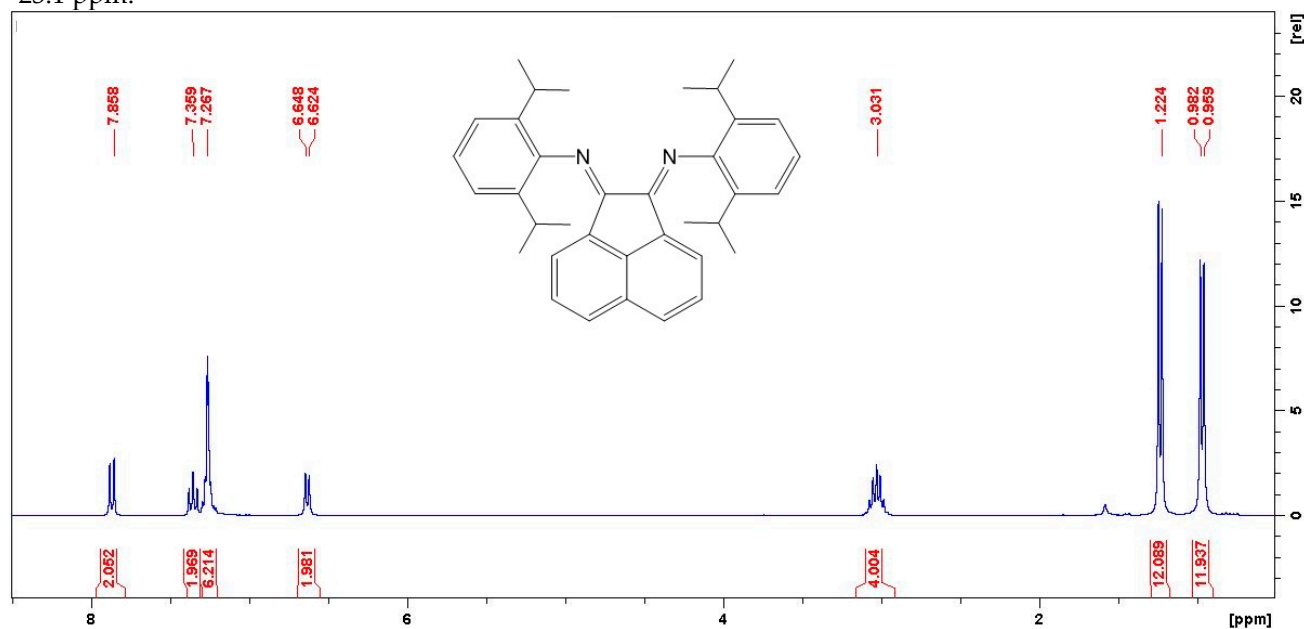Figure S3.  $^1\text{H}$ -NMR of *i*-Pr-BIAN in  $\text{CDCl}_3$ .

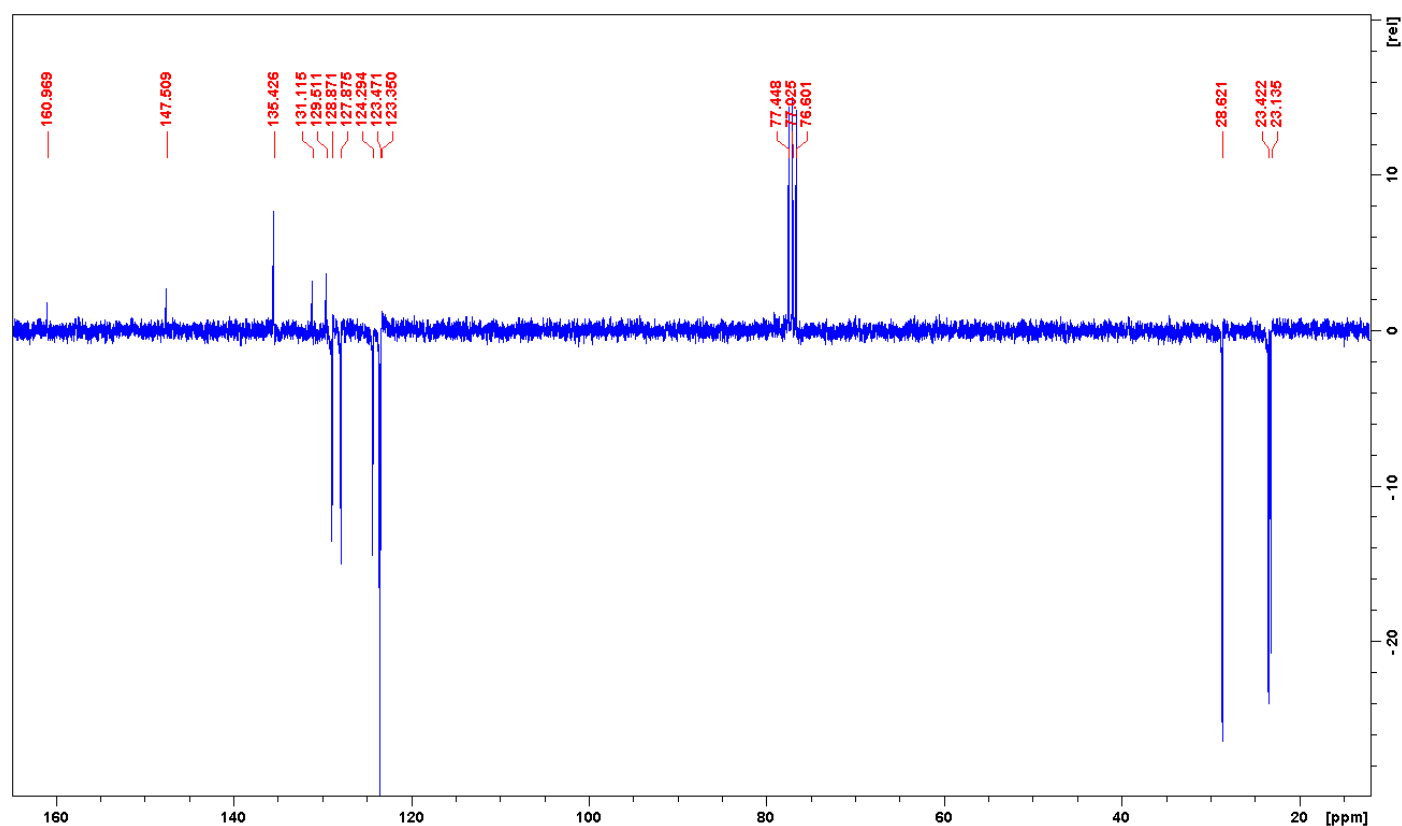Figure S4.  $^{13}\text{C}$ -NMR of *i*-Pr-BIAN in  $\text{CDCl}_3$ 

c.  **$N^1,N^2$ -Bis(4-methoxyphenyl)acenaphthylene-1,2-diimine (MeO-BIAN):** dark red crystalline solid

Analytical data:

$^1\text{H}$  NMR (300 MHz,  $\text{CDCl}_3$ , 20 °C):  $\delta$  = 7.89 (d,  $J$  = 8.28 Hz, 2H), 7.39 (t,  $J$  = 7.74, 2H), 7.11 – 7.09 (m, 4H), 7.05 – 7.00 (m, 6H), 3.81 (s, 6H) ppm;

$^{13}\text{C}$  NMR (75.5 MHz,  $\text{CDCl}_3$ , 20 °C):  $\delta$  = 161.7, 157.0, 145.0, 141.8, 131.4, 129.0, 128.9, 127.7, 123.8, 119.9, 114.8, 55.6 ppm.

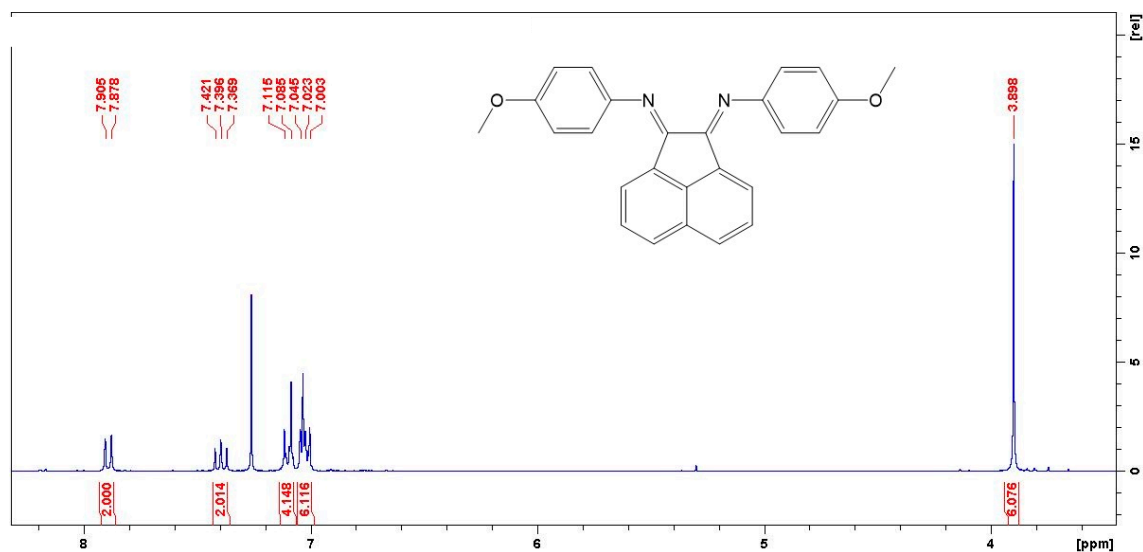Figure S5.  $^1\text{H}$ -NMR of MeO-BIAN in  $\text{CDCl}_3$ .

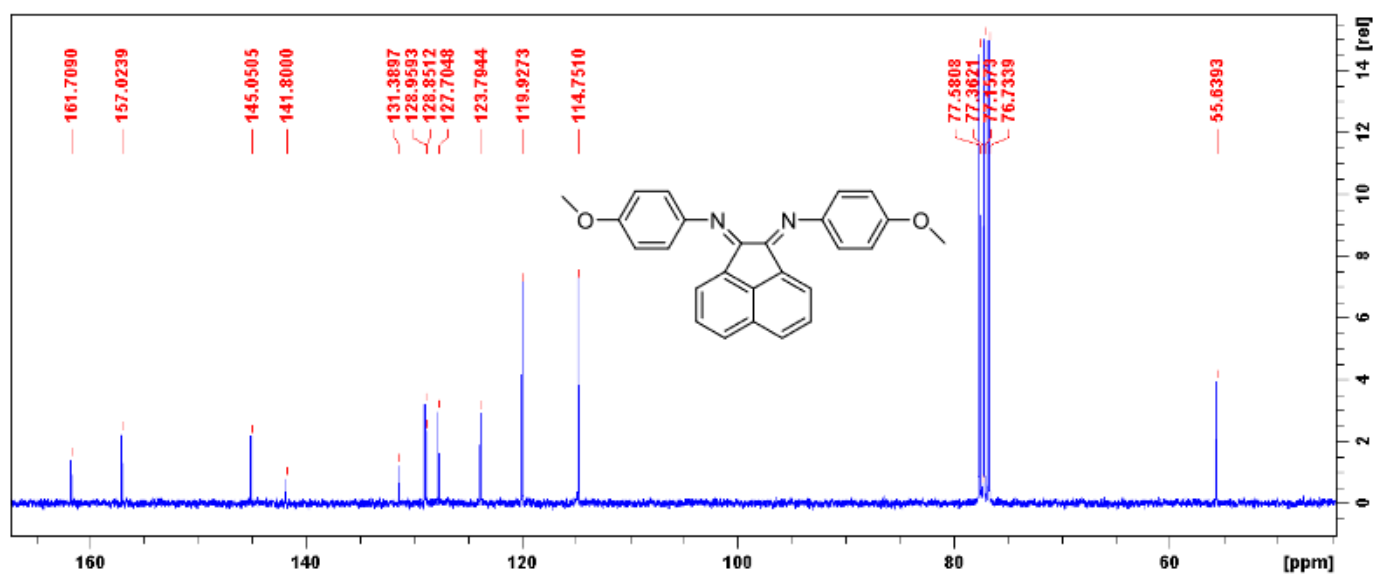Figure S6.  $^{13}\text{C}$ -NMR of MeO-BIAN in  $\text{CDCl}_3$ .

- d.  $N^1,N^2$ -Bis(3-(trifluoromethyl)phenyl)acenaphthylene-1,2-diimine ( $\text{F}_3\text{C}$ -BIAN): yellow crystalline solid

Analytical data:

$^1\text{H}$  NMR (300 MHz,  $\text{CDCl}_3$ , 20  $^\circ\text{C}$ ):  $\delta$  = 8.0 (d,  $J$  = 8.19 Hz, 2H), 7.61 – 7.57 (m, 4H), 7.49 – 7.44 (m, 4H), 7.30 (d,  $J$  = 7.8 Hz, 2H), 6.90 (d,  $J$  = 7.0 Hz, 2H) ppm;

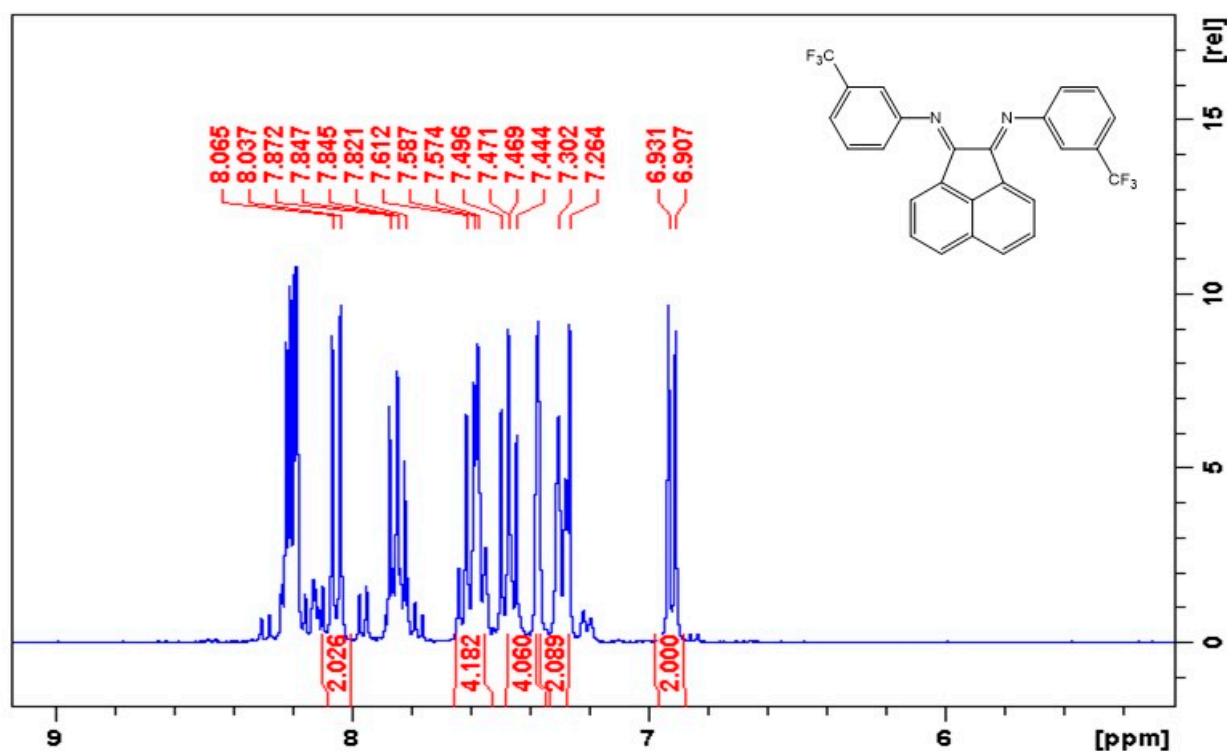Figure S7.  $^1\text{H}$ -NMR of  $\text{F}_3\text{C}$ -BIAN in  $\text{CDCl}_3$ .

## 2. SEC-MS Experiments

### a. F<sub>3</sub>C-BIAN

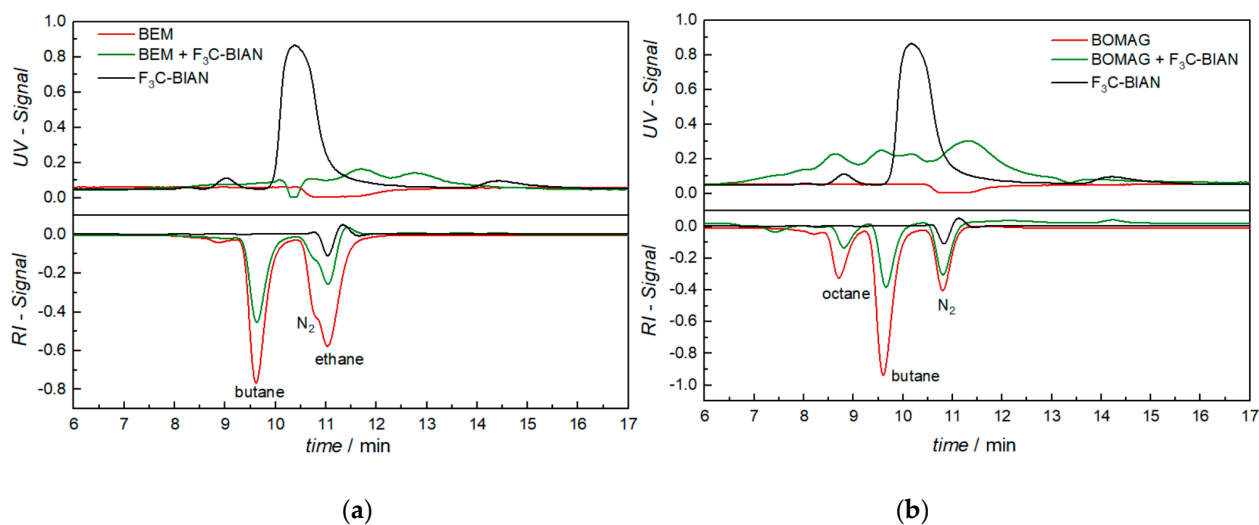

Figure S8. Size exclusion chromatograms using UV (top) and RI (bottom) detection: (a) analysis of F<sub>3</sub>C-BIAN (black), BEM (red), and the mixture of BEM with F<sub>3</sub>C-BIAN (green) and (b) F<sub>3</sub>C-BIAN (black), BOMAG (red), and the mixture of BOMAG with F<sub>3</sub>C-BIAN (green).

Table S1. MS identification of the active F<sub>3</sub>C-BIAN – alkyl magnesium compounds.

| Structure | Alkyl residue -R | <i>t<sub>R</sub></i> / min | <i>m/z</i> observed | <i>m/z</i> calculated |
|-----------|------------------|----------------------------|---------------------|-----------------------|
|           | -                | 8.80                       | 469.1133            | 468.1061              |
|           | ethyl            | 9.36                       | 498.1534            | 498.1525              |
|           | butyl            | 8.90                       | 526.1847            | 526.1838              |
|           | octyl            | 8.30                       | 582.2481            | 582.2464              |
|           | ethyl            | 13.23                      | 338.1158            | 338.1151              |
|           | butyl            | 12.10                      | 366.1470            | 366.1464              |
|           | octyl            | 10.27                      | 422.2105            | 422.2090              |

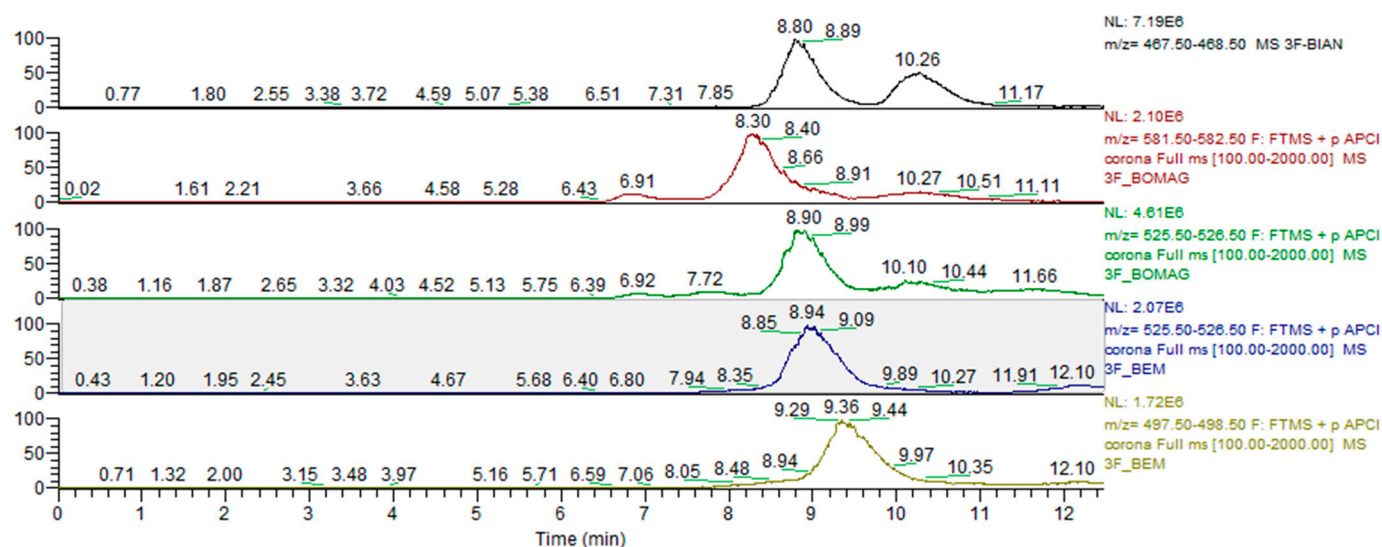

Figure S9. SEC-MS results of F<sub>3</sub>C-BIAN. In black pure F<sub>3</sub>C-BIAN with  $m/z$ = 468.1061, and furthermore the radical structures formed with F<sub>3</sub>C-BIAN with BOMAG and BEM at the following  $m/z$  ratios: 582.2481 (red), 526.1847 (green and blue) and 498.1534 (yellow).

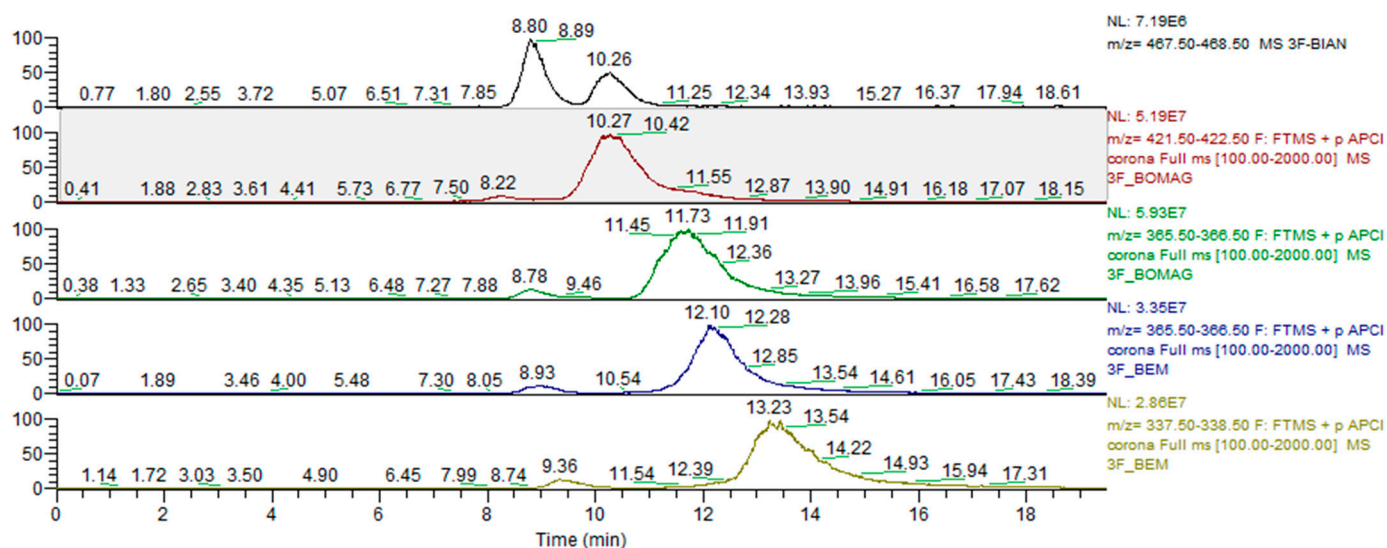

Figure S10. SEC-MS results of F<sub>3</sub>C-BIAN. In black pure F<sub>3</sub>C-BIAN with  $m/z$ = 468.1061, and furthermore the double bond structures formed with F<sub>3</sub>C-BIAN with BOMAG and BEM at the following  $m/z$  ratios: 422.2105 (red), 366.1470 (green and blue) and 338.1158 (yellow).

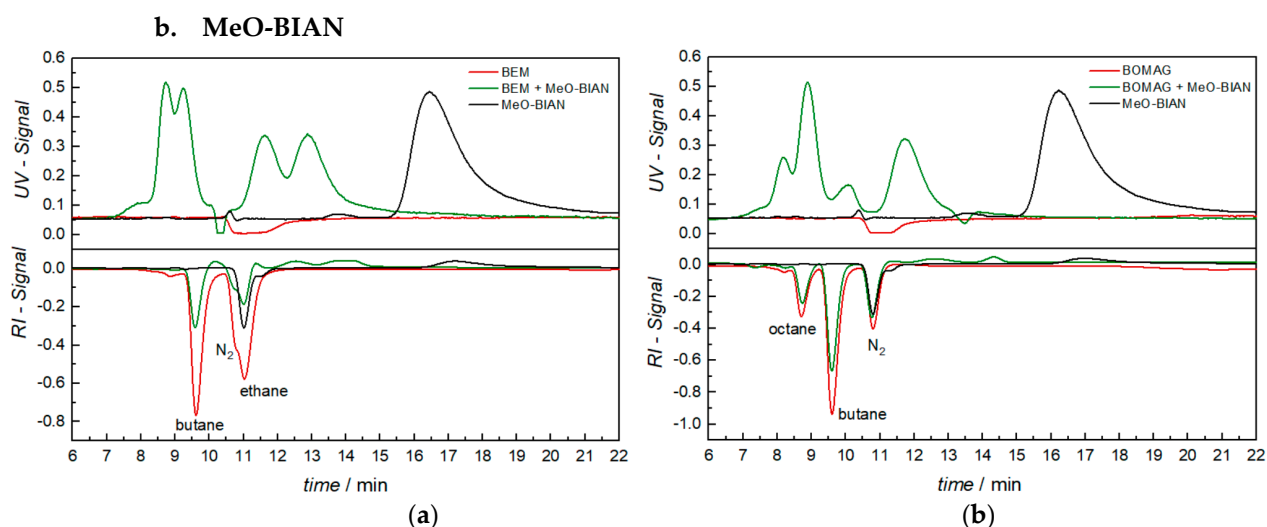

Figure S11. Size exclusion chromatograms using UV (top) and RI (bottom) detection: (a) analysis of MeO-BIAN (black), BEM (red), and the mixture of BEM with MeO-BIAN (green) and (b) MeO-BIAN (black), BOMAG (red), and the mixture of BOMAG with MeO-BIAN (green).

Table S2. MS identification of the active MeO-BIAN – alkyl magnesium compounds.

| Structure                                                                           | Alkyl residue - R | $t_R$ / min | $m/z$ observed | $m/z$ calculated |
|-------------------------------------------------------------------------------------|-------------------|-------------|----------------|------------------|
| MeO-BIAN                                                                            | -                 | 16.42       | 393.1597       | 393.1603         |
| 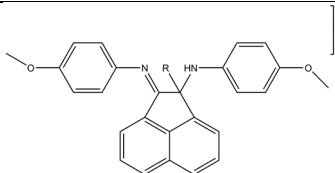 | ethyl             | 9.63        | 422.1999       | 422.1989         |
|                                                                                     | butyl             | 9.10        | 450.2314       | 450.2302         |
|                                                                                     | octyl             | 9.46        | 506.2931       | 506.2928         |
|  | ethyl             | 13.25       | 300.1389       | 300.1383         |
|                                                                                     | butyl             | 12.01       | 328.1698       | 328.1696         |
|                                                                                     | octyl             | 11.55       | 384.2326       | 384.2322         |

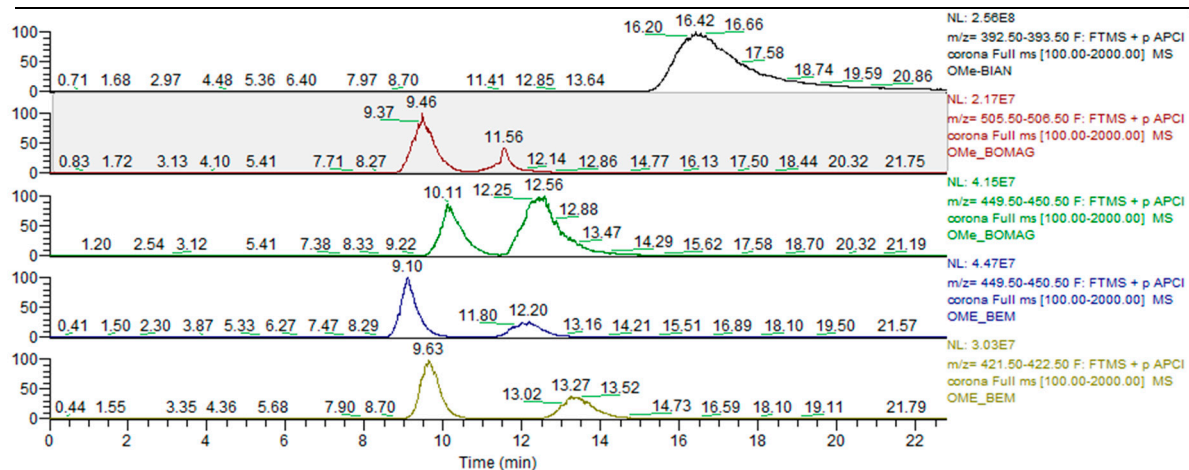

Figure S12. SEC-MS results of MeO-BIAN. In black pure MeO-BIAN with  $m/z$  = 393.1597, and furthermore the radical structures formed with MeO-BIAN with BOMAG and BEM at the following  $m/z$  ratios: 506.2931 (red), 450.2314 (green and blue) and 422.1999 (yellow).



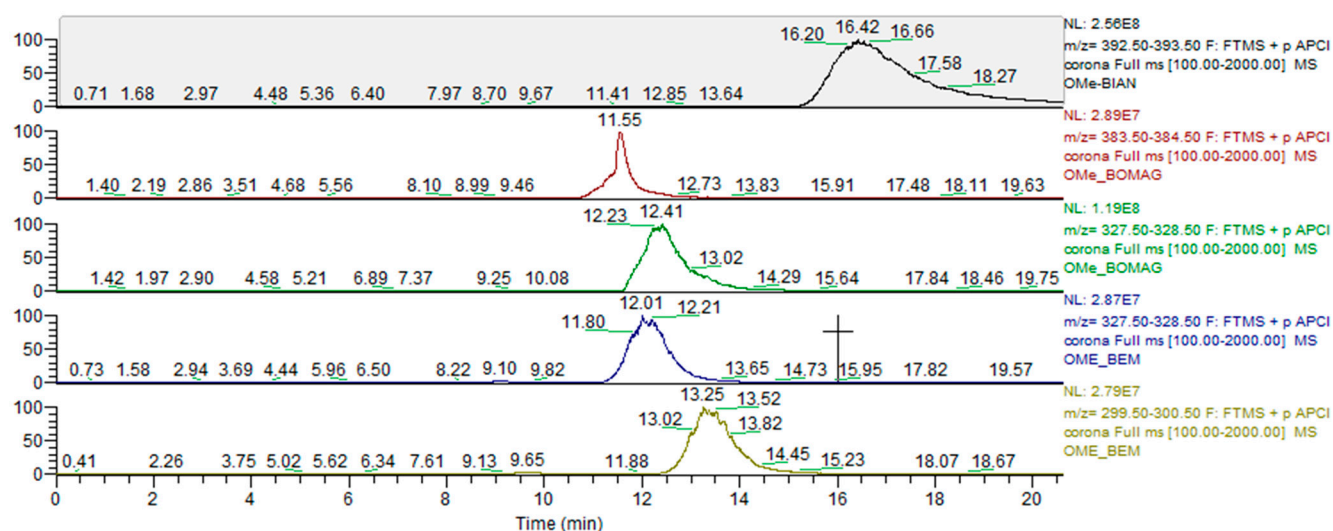

Figure S13. SEC-MS results of MeO-BIAN. In black pure MeO-BIAN with  $m/z = 393.1597$ , and furthermore the double bound structures formed with MeO-BIAN with BOMAG and BEM at the following  $m/z$  ratios: 384.2326 (red), 328.1698 (green and blue) and 300.1389 (yellow).

### c. *i*-Pr-BIAN

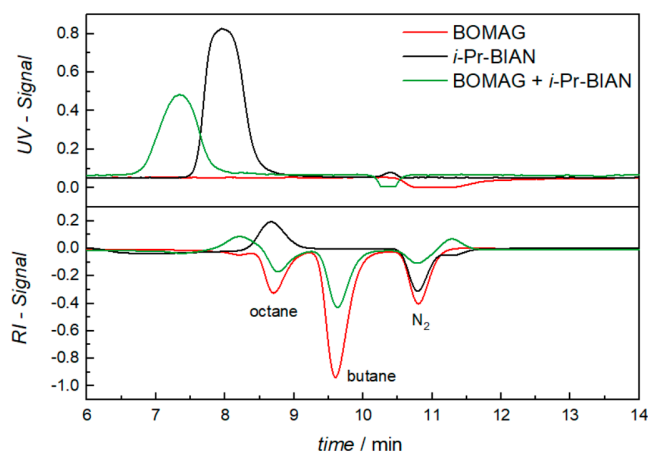

Figure S14. Size exclusion chromatograms using UV (top) and RI (bottom) detection: analysis of *i*-Pr-BIAN (black), BOMAG (red), and the mixture of BOMAG with *i*-Pr-BIAN (green).

Table S3. MS identification of the active *i*-Pr-BIAN – alkyl magnesium compounds.

| Structure                                                                           | Alkyl residue -R | $t_R$ / min | $m/z$ observed | $m/z$ calculated |
|-------------------------------------------------------------------------------------|------------------|-------------|----------------|------------------|
| <i>i</i> -Pr-BIAN                                                                   | -                | 8.06        | 501.3268       | 501.3264         |
| 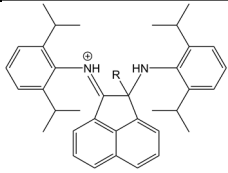 | ethyl            | 7.86        | 531.3739       | 531.3734         |
|                                                                                     | butyl            | 7.79        | 559.4050       | 559.4047         |
|                                                                                     | octyl            | 7.56        | 615.4688       | 615.4673         |



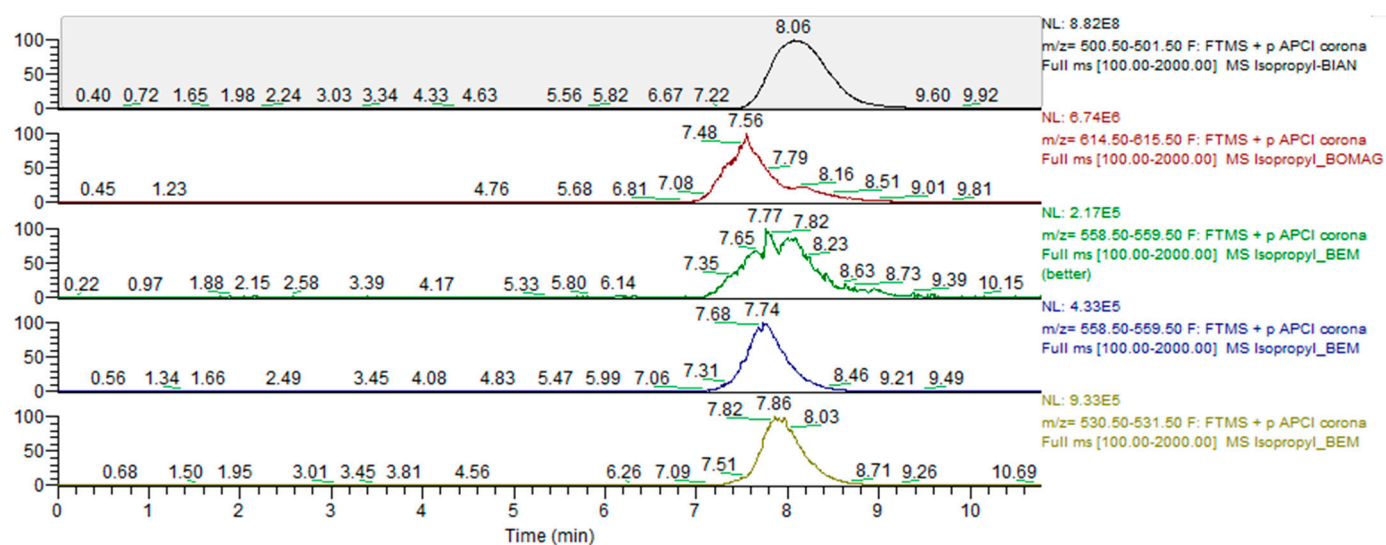

Figure S15. SEC-MS results of *i*-Pr-BIAN. In black pure *i*-Pr-BIAN with m/z= 501.3268 and furthermore the structures formed with *i*-Pr-BIAN with BOMAG and BEM at the following m/z ratios: 615.4688 (red), 559.4050 (green and blue) and 531.3739 (yellow).

### 3. NMR spectroscopy of the inert reaction mixture of *i*-Prop-BIAN with BOMAG

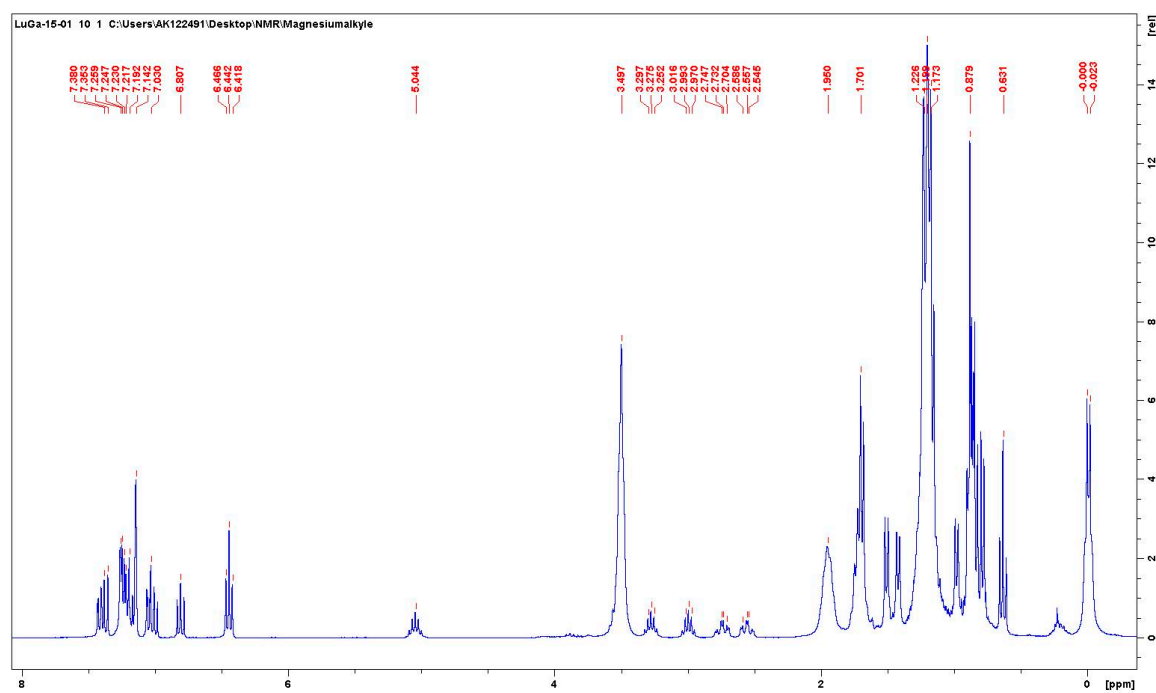

Figure S16. <sup>1</sup>H-NMR of *i*-Pr-BIAN modified BOMAG in D<sub>6</sub>C<sub>6</sub>.

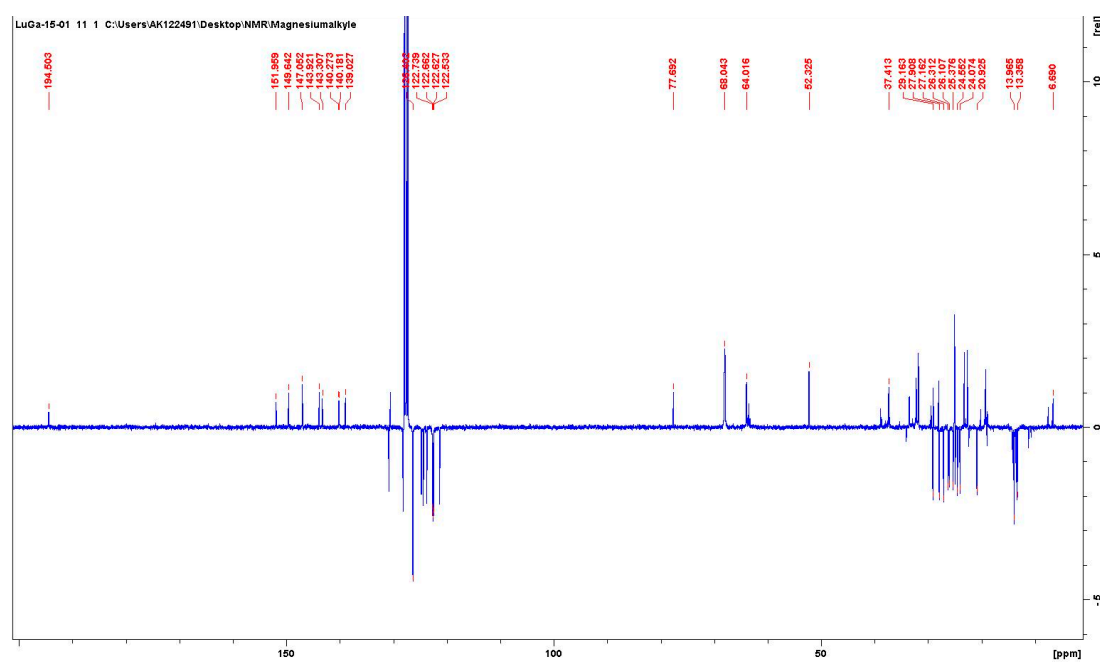

Figure S17.  $^{13}\text{C}$ -NMR of *i*-Pr-BIAN modified BOMAG in  $\text{D}_6\text{C}_6$ .

#### 4. HPLC-MS of quenched products

Scheme 1 shows the structures which have been assigned according to high resolution MS data (Table 3). The exact position of the alkyl groups can not always be assigned unequivocally. Also, the exact position of the double bonds cannot be assigned by the experiments carried out in this study.

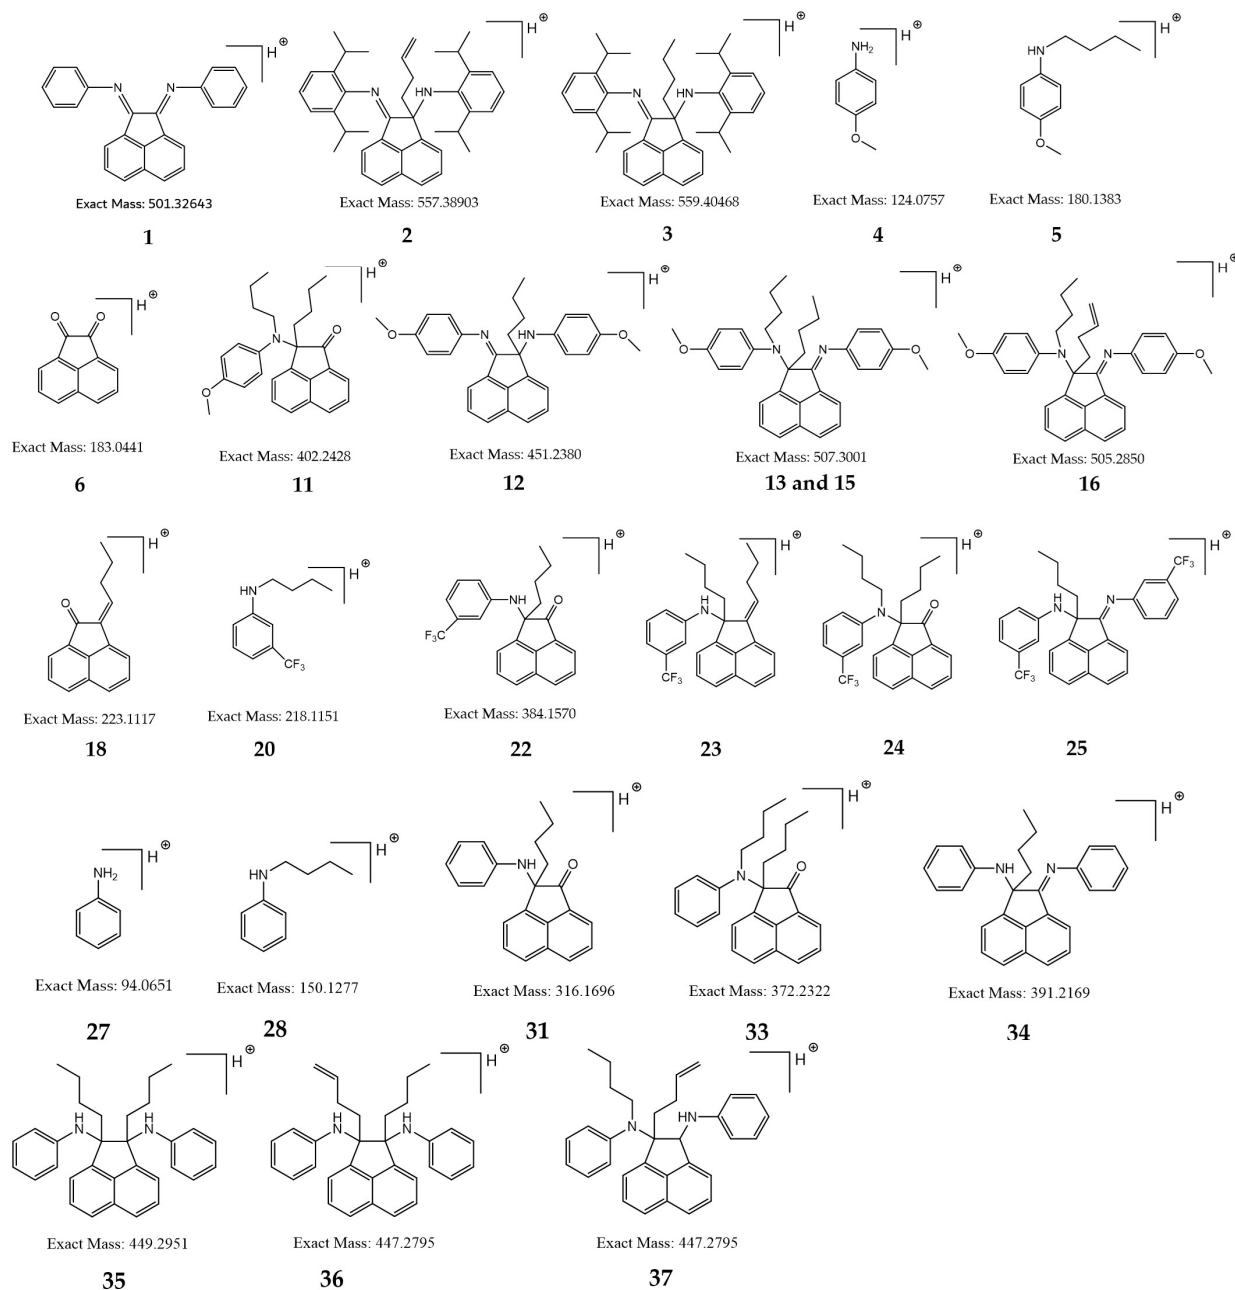

Scheme S1. Tentative structures for the quenched BIAN products with dibutyl magnesium.

## 5. NMR spectroscopy of quenched BIANs

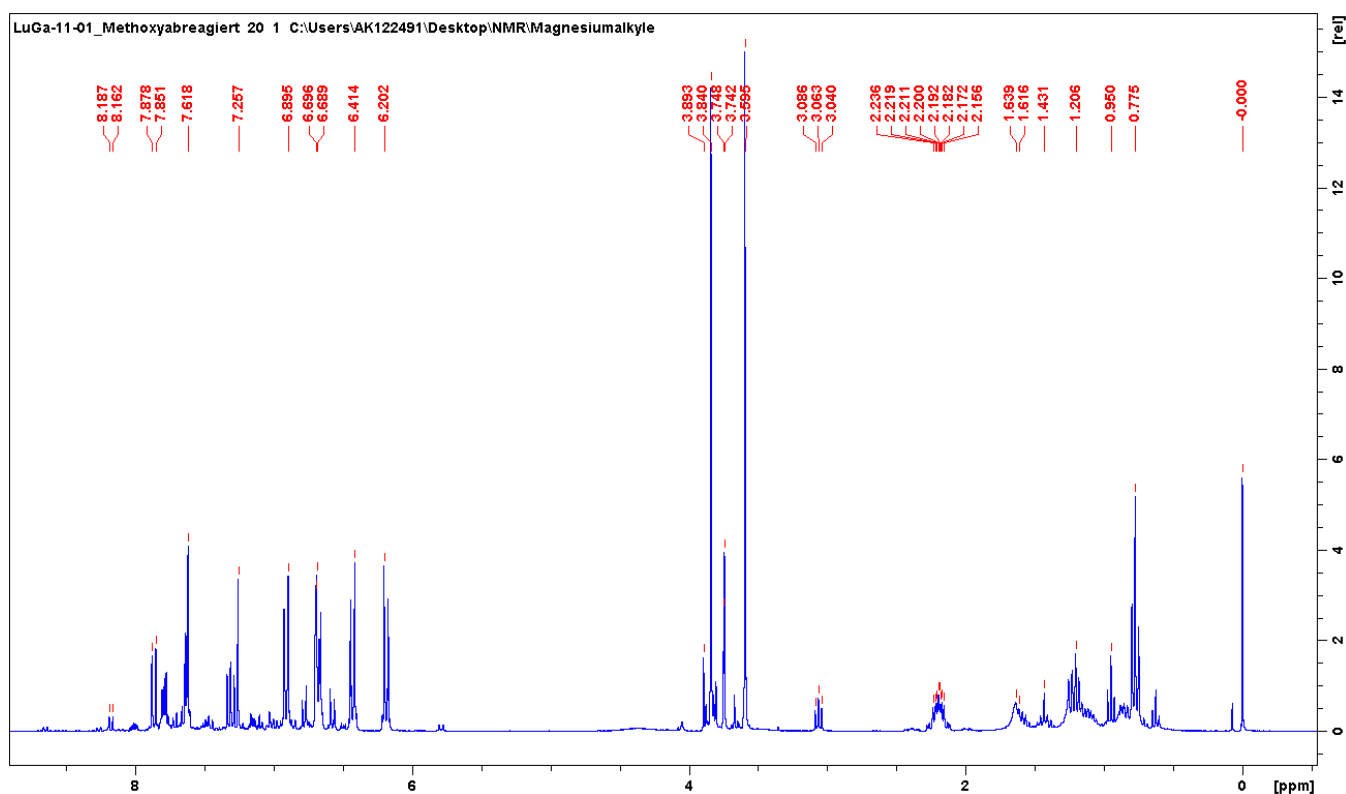

Figure S18.  $^1\text{H}$ -NMR of quenched MeO-BIAN in  $\text{CDCl}_3$ .

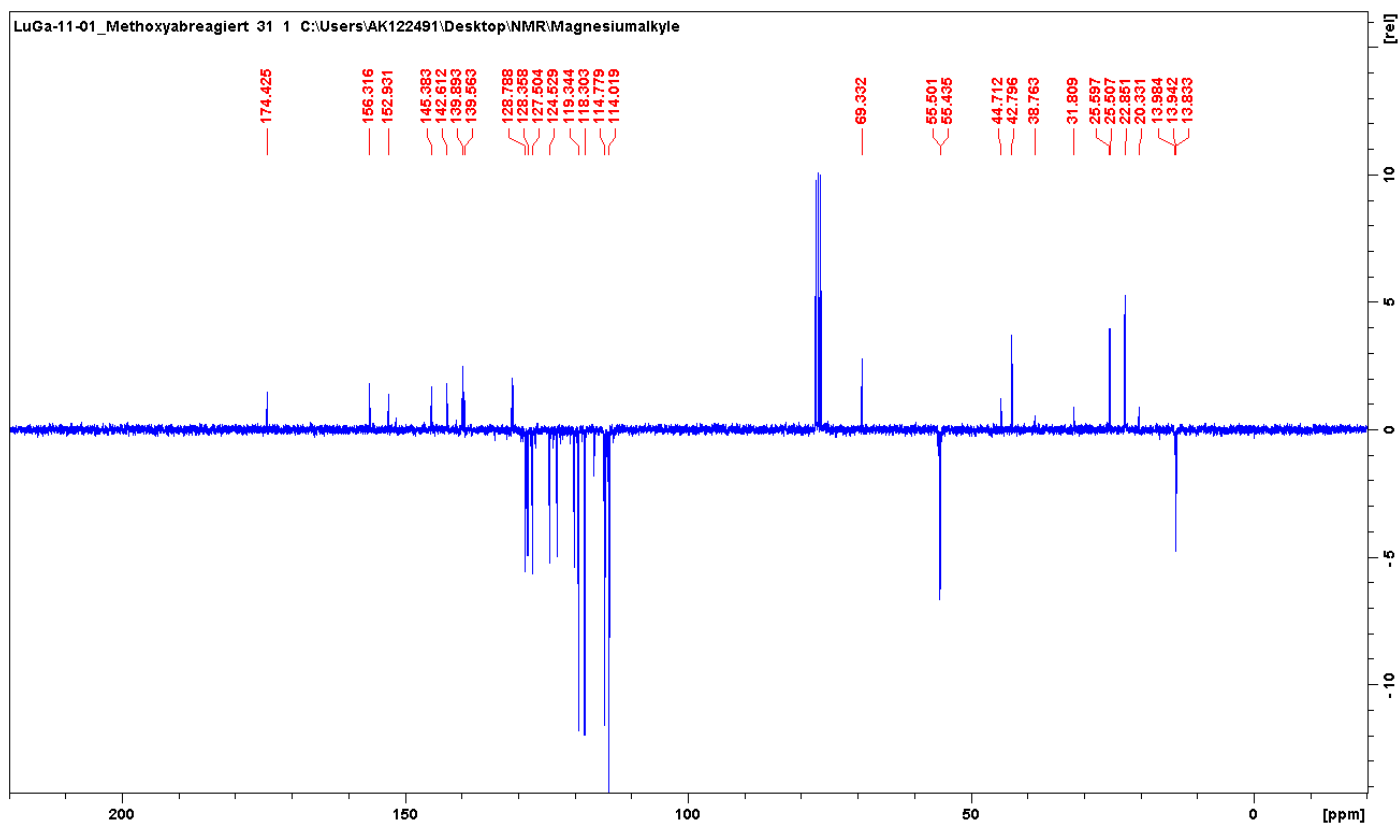

Figure S19.  $^{13}\text{C}$ -NMR of quenched MeO-BIAN in  $\text{CDCl}_3$ .

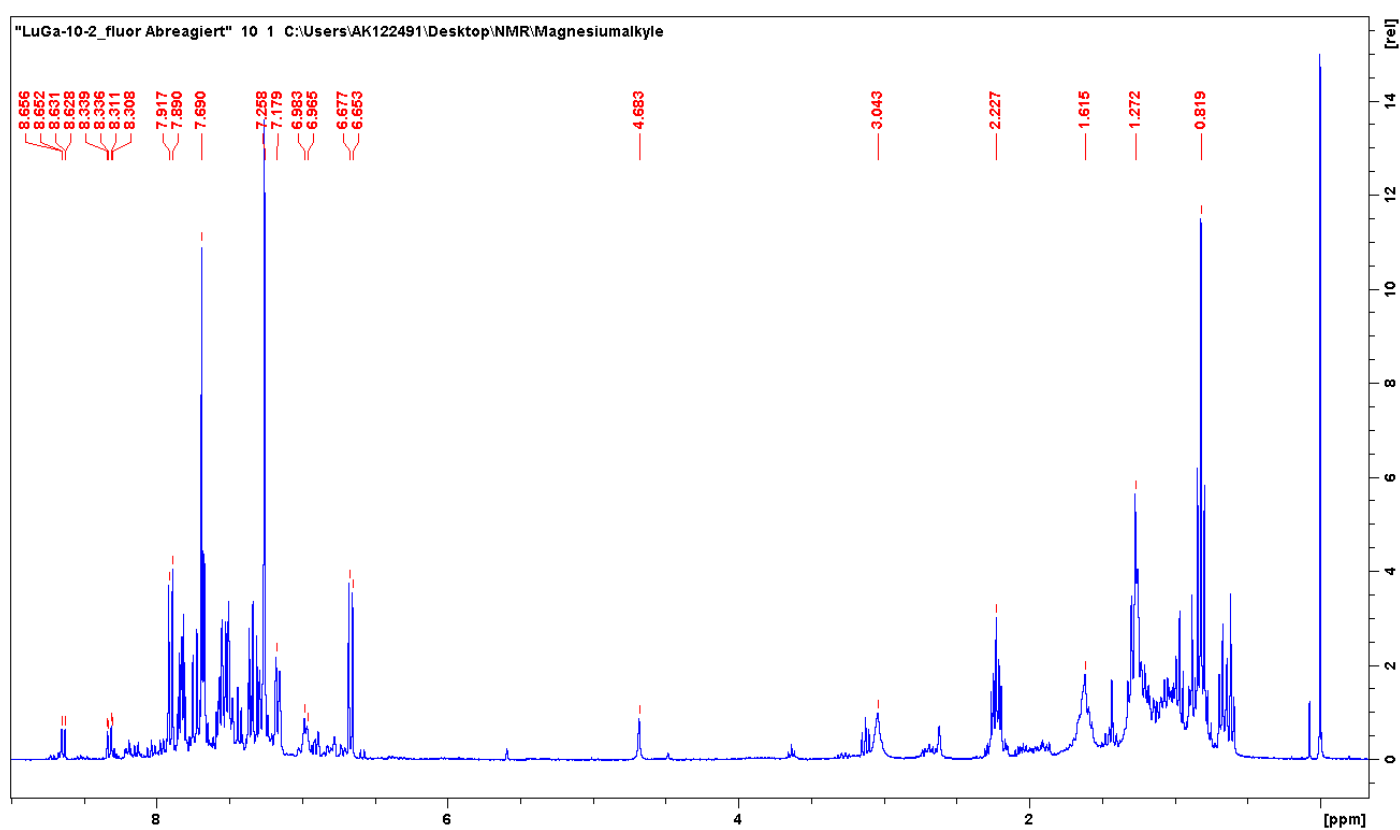Figure S20.  $^1\text{H}$ -NMR of quenched  $\text{F}_3\text{C}$ -BIAN in  $\text{CDCl}_3$ .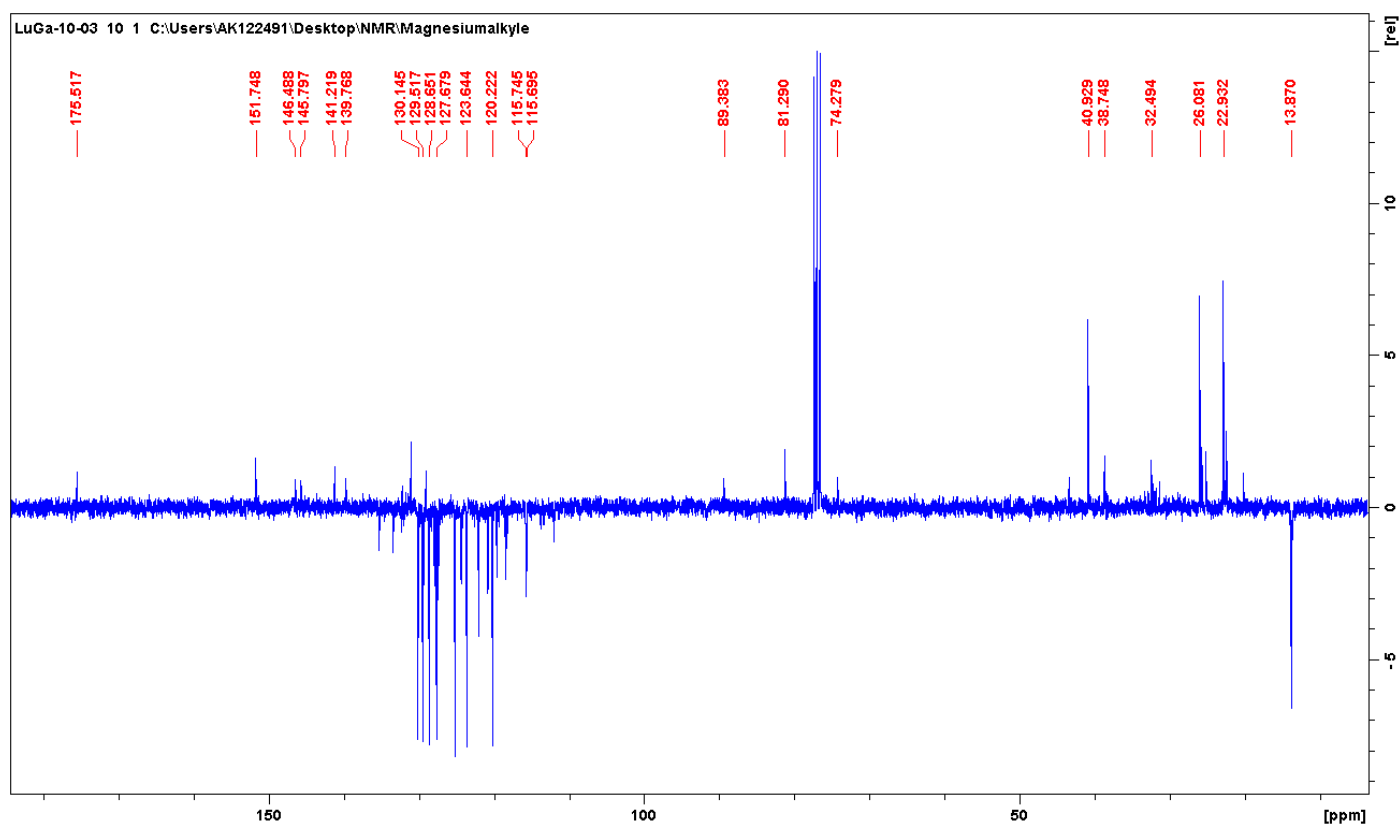Figure S21.  $^{13}\text{C}$ -NMR of quenched  $\text{F}_3\text{C}$ -BIAN in  $\text{CDCl}_3$ .
